# Supplementary material for: Study of the Bed Velocity Induced by Twin Propellers
Source: Atypon-hosted journal article supplement (doi:10.1061/(asce)ww.1943-5460.0000382), 2017-04-11
Supplement: supplemental_data_ww.1943-5460.0000382_mujal-colilles.pdf [file supplemental_data_ww.1943-5460.0000382_mujal-colilles.pdf]

*ASCE Journal of Waterway, Port, Coastal and Ocean Engineering*

**Study of the Bed Velocity Induced by Twin Propellers**

A. Mujal-Colilles, X. Gironella, A. J. C. Crespo, A. Sanchez-Arcilla

**DOI:** 10.1061/(ASCE)WW.1943-5460.0000382

**Supplemental Data**

Table S1: Velocity Component Measurements at Each Point

| X (cm) | Y (cm) | Z (cm) | Vx (cm/s) | Vy (cm/s) | Vz (cm/s) |
|--------|--------|--------|-----------|-----------|-----------|
| 63.5   | 0      | 16.75  | 31.69     | 1.36      | -5.53     |
| 63.5   | -15    | 16.43  | 29.15     | 5.23      | -5.42     |
| 63.5   | -30    | 16.56  | 47.78     | -1.71     | -0.06     |
| 63.5   | -45.5  | 16.48  | 20.69     | 5.77      | 2.87      |
| 63.5   | -61    | 16.93  | -0.78     | 13.62     | 1.44      |
| 63.5   | -76.5  | 16.91  | -5.44     | 16.26     | 0.77      |
| 127    | 0      | 17.46  | 46.08     | 0.04      | -4.2      |
| 127    | -15    | 17.3   | 41.03     | -3.07     | -4.84     |
| 127    | -30    | 17.43  | 32.4      | -1.84     | -4.38     |
| 127    | -45.5  | 17.49  | 22.63     | -0.18     | -2.26     |
| 127    | -61    | 17.84  | 11.48     | 1.62      | -0.73     |
| 127    | -76.5  | 17.86  | 2.7       | 4.26      | 0.22      |
| 190.5  | 0      | 17.91  | 38.12     | 0.41      | -2.42     |
| 190.5  | -15    | 17.8   | 35.47     | -3.64     | -2.24     |
| 190.5  | -30    | 18.05  | 29.47     | -3.86     | -1.98     |
| 190.5  | -45.5  | 18.2   | 23.75     | -4.19     | -1.46     |
| 190.5  | -61    | 18.57  | 16.19     | -5.54     | -1.51     |
| 190.5  | -76.5  | 18.79  | 8.6       | -5.41     | -0.86     |
| 254    | 0      | 18.19  | 30.44     | -0.63     | -0.29     |
| 254    | -15    | 18.01  | 28.47     | -4        | -0.59     |
| 254    | -30    | 18.09  | 24.86     | -4.99     | -1        |
| 254    | -45.5  | 18.4   | 20.87     | -6.25     | -1.05     |
| 254    | -61    | 18.83  | 15.57     | -8.48     | -1.2      |
| 254    | -76.5  | 18.79  | 10.34     | -9.62     | -1.16     |
| 381    | 0      | 18.84  | 12.44     | -2.76     | 0.42      |

**SUPPLEMENTAL DATA**

|       |       |       |       |        |        |
|-------|-------|-------|-------|--------|--------|
| 381   | -15   | 18.7  | 11.81 | -4.57  | 0.06   |
| 381   | -30   | 18.91 | 11.07 | -5.3   | 0.09   |
| 381   | -45.5 | 19    | 9.66  | -5.83  | -0.22  |
| 381   | -61   | 19.29 | 7.63  | -7.22  | -0.25  |
| 381   | -76.5 | 19.44 | 5.83  | -8.18  | -0.18  |
| 381   | 0     | 8.92  | 15.71 | -4.32  | -0.43  |
| 381   | -15   | 8.71  | 14.74 | -6.58  | -0.63  |
| 381   | -30   | 8.96  | 14.16 | -7.59  | -0.67  |
| 381   | -45.5 | 8.96  | 12.46 | -8.55  | -0.44  |
| 381   | -61   | 9.29  | 10.5  | -10.4  | -0.67  |
| 381   | -76.5 | 9.22  | 7.79  | -11.48 | -0.78  |
| 254   | 0     | 8.23  | 39.86 | -0.7   | -1.21  |
| 254   | -15   | 8.01  | 36.76 | -5.61  | -1.27  |
| 254   | -30   | 8.15  | 31.51 | -7.22  | -1.36  |
| 254   | -45.5 | 8.06  | 26.22 | -8.9   | -1.37  |
| 254   | -61   | 8.67  | 20.2  | -12.16 | -1.74  |
| 254   | -76.5 | 8.67  | 13.9  | -13.61 | -1.9   |
| 190.5 | 0     | 7.93  | 51.56 | -1.5   | -2.09  |
| 190.5 | -15   | 7.79  | 46.41 | -7.69  | -2.12  |
| 190.5 | -30   | 8.02  | 38.15 | -9     | -2.36  |
| 190.5 | -45.5 | 8.16  | 29.72 | -10.02 | -2.4   |
| 190.5 | -61   | 8.57  | 21.07 | -12.17 | -2.5   |
| 190.5 | -76.5 | 8.76  | 12.74 | -11.69 | -1.76  |
| 127   | 0     | 7.59  | 64.36 | -2.82  | -5.02  |
| 127   | -15   | 7.3   | 56.1  | -10.29 | -3.73  |
| 127   | -30   | 7.35  | 41.06 | -10.11 | -3.29  |
| 127   | -45.5 | 7.49  | 27.6  | -8.68  | -2.16  |
| 127   | -61   | 7.68  | 15.87 | -7.02  | -1.66  |
| 127   | -76.5 | 7.84  | 6.1   | -3.76  | -0.52  |
| 63.5  | 0     | 6.77  | 32.47 | -0.05  | -10.52 |
| 63.5  | -15   | 6.29  | 29.49 | -1.47  | -6.34  |
| 63.5  | -30   | 6.39  | 31.9  | -6.92  | -4.88  |
| 63.5  | -45.5 | 6.47  | 15.74 | -1.24  | -0.53  |
| 63.5  | -61   | 6.94  | 0.7   | 7      | 0.83   |
| 63.5  | -76.5 | 6.88  | -6.49 | 12.34  | 1.11   |
| 63.5  | 76.5  | 7.09  | -4.57 | -9.17  | 0.43   |
| 63.5  | 61.5  | 6.72  | 5.4   | -3.35  | 0.35   |

**SUPPLEMENTAL DATA**

|       |      |       |       |       |       |
|-------|------|-------|-------|-------|-------|
| 63.5  | 46.5 | 6.74  | 23.12 | 6.02  | -1.54 |
| 63.5  | 31   | 6.62  | 35.22 | 9.24  | -5.55 |
| 63.5  | 15.5 | 6.85  | 32.05 | -1.41 | -7.19 |
| 63.5  | 0    | 6.65  | 33.46 | -1.96 | -9.39 |
| 127   | 76.5 | 7.59  | 13.22 | 5.26  | -0.35 |
| 127   | 61.5 | 7.32  | 26.54 | 8.6   | -0.92 |
| 127   | 46.5 | 7.29  | 39.24 | 11.48 | -2.36 |
| 127   | 31   | 7.2   | 54.82 | 12.38 | -2.89 |
| 127   | 15.5 | 7.42  | 66.78 | 4.5   | -5.24 |
| 127   | 0    | 7.45  | 69.7  | -4.23 | -6.6  |
| 190.5 | 76.5 | 7.8   | 22.35 | 15.09 | -1.92 |
| 190.5 | 61.5 | 7.37  | 33.07 | 13.36 | -1.88 |
| 190.5 | 46.5 | 7.59  | 40.95 | 12.09 | -1.95 |
| 190.5 | 31   | 7.65  | 50.92 | 10.05 | -1.62 |
| 190.5 | 15.5 | 8.02  | 58.24 | 2.27  | -2.23 |
| 190.5 | 0    | 7.7   | 60.47 | -5.22 | -3.25 |
| 254   | 76.5 | 8.02  | 23.43 | 13.97 | -1.73 |
| 254   | 61.5 | 7.54  | 29.85 | 10.66 | -1.56 |
| 254   | 46.5 | 7.61  | 33.75 | 8.72  | -1.34 |
| 254   | 31   | 7.67  | 38.58 | 6.15  | -0.86 |
| 254   | 15.5 | 8.19  | 41.67 | 0.24  | -1.26 |
| 254   | 0    | 8.05  | 42.61 | -5.04 | -1.48 |
| 381   | 76.5 | 8.85  | 14.66 | 6.64  | -0.21 |
| 381   | 61.5 | 8.29  | 16.26 | 5.05  | -0.26 |
| 381   | 46.5 | 8.48  | 16.26 | 4.04  | -0.28 |
| 381   | 31   | 8.48  | 17.03 | 2.91  | -0.35 |
| 381   | 15.5 | 8.79  | 16.9  | 0.34  | -0.27 |
| 381   | 0    | 8.71  | 16.16 | -1.47 | -0.43 |
| 381   | 76.5 | 18.67 | 11.57 | 4.59  | 0.07  |
| 381   | 61.5 | 18.24 | 13.44 | 3.15  | 0.19  |
| 381   | 46.5 | 18.57 | 13.37 | 2.3   | 0.21  |
| 381   | 31   | 18.42 | 13.55 | 1.45  | 0.19  |
| 381   | 15.5 | 18.7  | 13.43 | -0.32 | -0.01 |
| 381   | 0    | 18.72 | 12.74 | -1.94 | -0.03 |
| 254   | 76.5 | 17.8  | 19.07 | 10.08 | -1.56 |
| 254   | 61.5 | 17.47 | 24.46 | 7.55  | -1.81 |
| 254   | 46.5 | 17.69 | 27.66 | 6.05  | -1.56 |

**SUPPLEMENTAL DATA**

|       |      |       |        |        |       |
|-------|------|-------|--------|--------|-------|
| 254   | 31   | 17.53 | 31.69  | 4.23   | -0.99 |
| 254   | 15.5 | 18    | 33.24  | -0.2   | -1.13 |
| 254   | 0    | 17.89 | 33.26  | -3.72  | -1.13 |
| 190.5 | 76.5 | 17.81 | 17.31  | 6.67   | -1.33 |
| 190.5 | 61.5 | 17.3  | 25.6   | 6.3    | -2.18 |
| 190.5 | 46.5 | 17.43 | 31     | 6.48   | -2.83 |
| 190.5 | 31   | 17.58 | 36.11  | 5.78   | -2.68 |
| 190.5 | 15.5 | 17.9  | 38.65  | 1.62   | -2.65 |
| 190.5 | 0    | 17.67 | 39.69  | -2.41  | -2.08 |
| 127   | 76.5 | 17.53 | 7.36   | -1.98  | -0.81 |
| 127   | 61.5 | 17.16 | 19.09  | 0.46   | -1.33 |
| 127   | 46.5 | 17.11 | 31.89  | 3.44   | -3    |
| 127   | 31   | 17.2  | 42.26  | 4.73   | -4.75 |
| 127   | 15.5 | 17.37 | 48     | 0.75   | -4.53 |
| 127   | 0    | 17.35 | 47.98  | -2.14  | -3.97 |
| 63.5  | 76.5 | 16.95 | -8.13  | -16.14 | -0.33 |
| 63.5  | 61.5 | 16.55 | -0.98  | -12.93 | 0.62  |
| 63.5  | 46.5 | 16.65 | 27.81  | -2.77  | 2.8   |
| 63.5  | 31   | 16.54 | 53.26  | 5.38   | -1.71 |
| 63.5  | 15.5 | 16.75 | 32.71  | -2.8   | -6.77 |
| 63.5  | 0    | 16.64 | 34.34  | 0.52   | -5.68 |
| 63.5  | 76.5 | 27.65 | -10.27 | -18.2  | -0.72 |
| 63.5  | 61.5 | 27.26 | -4.68  | -15.68 | 1.64  |
| 63.5  | 46.5 | 27.24 | 19.02  | -10.23 | 6.86  |
| 63.5  | 31   | 27.28 | 49.37  | -7.85  | 3.79  |
| 63.5  | 15.5 | 27.49 | 57.08  | 0.34   | -5.27 |
| 63.5  | 0    | 27.47 | 62.34  | -3.49  | -6.3  |
| 127   | 76.5 | 27.65 | 1.61   | -5.64  | -0.56 |
| 127   | 61.5 | 27.26 | 12.84  | -2.52  | -0.66 |
| 127   | 46.5 | 27.24 | 26.08  | 1.44   | -1.91 |
| 127   | 31   | 27.28 | 34.98  | 3.63   | -2.82 |
| 127   | 15.5 | 27.49 | 40.41  | 0.85   | -2.15 |
| 127   | 0    | 27.47 | 40.29  | -2.13  | -2.05 |
| 190.5 | 76.5 | 27.85 | 11.32  | 4.39   | -1.01 |
| 190.5 | 61.5 | 27.41 | 17.82  | 4.18   | -1.75 |
| 190.5 | 46.5 | 27.66 | 21.24  | 4.11   | -2.11 |
| 190.5 | 31   | 27.71 | 24.2   | 3.69   | -2.28 |

**SUPPLEMENTAL DATA**

|       |      |       |       |       |       |
|-------|------|-------|-------|-------|-------|
| 190.5 | 15.5 | 28.02 | 26.25 | 1.47  | -2.04 |
| 190.5 | 0    | 27.81 | 27.11 | -0.63 | -1.71 |
| 254   | 76.5 | 27.88 | 11.57 | 6.18  | -1.02 |
| 254   | 61.5 | 27.51 | 15.2  | 5.01  | -1.14 |
| 254   | 46.5 | 27.71 | 16.85 | 4.37  | -1.37 |
| 254   | 31   | 27.66 | 18.31 | 3.14  | -1.08 |
| 254   | 15.5 | 28.05 | 19.85 | 0.51  | -1.01 |
| 254   | 0    | 28.01 | 20.44 | -1.63 | -0.67 |
| 381   | 76.5 | 28.79 | 6.07  | 1.8   | 0.12  |
| 381   | 61.5 | 28.29 | 8.07  | 0.52  | 0.36  |
| 381   | 46.5 | 28.51 | 9.1   | -0.58 | 0.44  |
| 381   | 31   | 28.41 | 9.96  | -1.17 | 1.03  |
| 381   | 15.5 | 28.73 | 10.14 | -2.81 | 0.66  |
| 381   | 0    | 28.78 | 9.3   | -4.02 | 0.22  |
| 381   | 76.5 | 38.67 | 3.95  | 1.61  | -0.16 |
| 381   | 61.5 | 38.24 | 4.95  | 0.63  | -0.26 |
| 381   | 46.5 | 38.57 | 5.22  | -0.16 | 0.04  |
| 381   | 31   | 38.42 | 5.66  | -1.05 | 0.19  |
| 381   | 15.5 | 38.7  | 5.89  | -2.37 | 0.45  |
| 381   | 0    | 38.72 | 5.63  | -3.6  | 0.24  |
| 254   | 76.5 | 37.8  | 9.09  | 6.13  | -0.67 |
| 254   | 61.5 | 37.47 | 11.8  | 4.74  | -0.59 |
| 254   | 46.5 | 37.69 | 13.4  | 4.33  | -0.86 |
| 254   | 31   | 37.53 | 15.17 | 3.45  | -0.81 |
| 254   | 15.5 | 38    | 15.75 | 1.08  | -0.96 |
| 254   | 0    | 37.89 | 15.46 | -0.74 | -0.95 |
| 190.5 | 76.5 | 37.81 | 11.7  | 4.05  | -0.34 |
| 190.5 | 61.5 | 37.3  | 17.33 | 3.27  | -0.75 |
| 190.5 | 46.5 | 37.43 | 20.42 | 3.23  | -0.7  |
| 190.5 | 31   | 37.58 | 22.36 | 2.73  | -0.67 |
| 190.5 | 15.5 | 37.9  | 22.64 | 0.9   | -1.06 |
| 190.5 | 0    | 37.67 | 22.01 | -0.38 | -1.03 |
| 127   | 76.5 | 37.53 | 2.93  | -2.41 | 0.35  |
| 127   | 61.5 | 37.16 | 13.09 | -0.3  | 1.08  |
| 127   | 46.5 | 37.11 | 23.28 | 1.66  | 1.45  |
| 127   | 31   | 37.2  | 30.05 | 3.49  | 1.85  |
| 127   | 15.5 | 37.37 | 32.99 | 1.59  | 2.47  |

**SUPPLEMENTAL DATA**

|       |       |       |       |        |       |
|-------|-------|-------|-------|--------|-------|
| 127   | 0     | 37.35 | 34.36 | -1.47  | 2.8   |
| 63.5  | 76.5  | 36.95 | -8.63 | -13.2  | -1.54 |
| 63.5  | 61.5  | 36.55 | -7.19 | -12.56 | -0.03 |
| 63.5  | 46.5  | 36.65 | -0.19 | -11.08 | 4.25  |
| 63.5  | 31    | 36.54 | 11.66 | -7.95  | 9.37  |
| 63.5  | 15.5  | 36.75 | 20.45 | -3.47  | 7.16  |
| 63.5  | 0     | 36.64 | 24.28 | -1.1   | 4.98  |
| 63.5  | 0     | 36.94 | 25.88 | -0.66  | 5.61  |
| 63.5  | -15   | 36.65 | 22.1  | 0.53   | 10.08 |
| 63.5  | -30   | 36.81 | 13.29 | 7.51   | 11.07 |
| 63.5  | -45.5 | 36.48 | 3.93  | 10.37  | 5.47  |
| 63.5  | -61   | 36.71 | -1.26 | 11.73  | 0.27  |
| 63.5  | -76.5 | 36.63 | -2.47 | 12.65  | -1.34 |
| 127   | 0     | 47.65 | 33.62 | -0.37  | 3.42  |
| 127   | -15   | 47.26 | 30.11 | -3.01  | 2.27  |
| 127   | -30   | 47.24 | 24.54 | -1.3   | 1.13  |
| 127   | -45.5 | 47.28 | 17.89 | 0.65   | 1.18  |
| 127   | -61   | 47.49 | 8.8   | 1.63   | 0.57  |
| 127   | -76.5 | 47.47 | 0.79  | 4.17   | 0.22  |
| 190.5 | 0     | 47.85 | 21.36 | 1.43   | -0.95 |
| 190.5 | -15   | 47.41 | 20.53 | -0.39  | -0.87 |
| 190.5 | -30   | 47.66 | 18.89 | -0.78  | -0.9  |
| 190.5 | -45.5 | 47.71 | 16.04 | -1.42  | -0.6  |
| 190.5 | -61   | 48.02 | 11.32 | -2.79  | -0.73 |
| 190.5 | -76.5 | 47.81 | 5.1   | -2.87  | -0.33 |
| 254   | 0     | 47.88 | 16.35 | 0.62   | -1.06 |
| 254   | -15   | 47.51 | 16.47 | -1.51  | -1.13 |
| 254   | -30   | 47.71 | 15.07 | -2.63  | -1.15 |
| 254   | -45.5 | 47.66 | 12.36 | -3.59  | -0.82 |
| 254   | -61   | 48.05 | 8.87  | -5.41  | -1.03 |
| 254   | -76.5 | 48.01 | 4.84  | -6.32  | -1.04 |
| 381   | 0     | 48.79 | 5.7   | -4.16  | -0.24 |
| 381   | -15   | 48.29 | 4.83  | -5.22  | -0.3  |
| 381   | -30   | 48.51 | 4.01  | -5.77  | -0.31 |
| 381   | -45.5 | 48.41 | 2.93  | -6.38  | -0.32 |
| 381   | -61   | 48.73 | 1.54  | -6.94  | -0.23 |
| 381   | -76.5 | 48.78 | 0.11  | -7.48  | -0.31 |

**SUPPLEMENTAL DATA**

|     |       |       |       |       |       |
|-----|-------|-------|-------|-------|-------|
| 381 | 0     | 28.62 | 10.49 | -3.57 | 0.01  |
| 381 | -15   | 28.42 | 9.98  | -5.03 | 0     |
| 381 | -30   | 28.96 | 9.01  | -5.78 | 0.04  |
| 381 | -45.5 | 28.69 | 7.51  | -6.45 | 0.23  |
| 381 | -61   | 29.03 | 5.51  | -7.27 | 0.04  |
| 381 | -76.5 | 29.08 | 3.66  | -7.85 | -0.05 |
| 254 | 0     | 27.8  | 21.95 | 0.71  | -1.17 |
| 254 | -15   | 27.75 | 21.58 | -2.13 | -0.76 |
| 254 | -30   | 27.87 | 18.81 | -3.12 | -0.92 |
| 254 | -45.5 | 28.08 | 15.46 | -4.32 | -1.05 |
